# Supplementary material for: Semantic Features Reveal Different Networks During Word Processing: An EEG Source Localization Study
Source: PubMed Central journal article supplement (PMC6300518; doi:10.3389/fnhum.2018.00503), 2018-12-13
Supplement: Presentation_1.pdf [file Presentation_1.pdf]

## *Supplementary Material*

# Semantic features reveal different networks during word processing: an EEG source localization study

Mansoureh Fahimi Hnazaee\*, Elvira Khachatryan, Marc M. Van Huller

\* **Correspondence:** Mansoureh Fahimi Hnazaee: mansoureh.fahimihnazaee@kuleuven.be

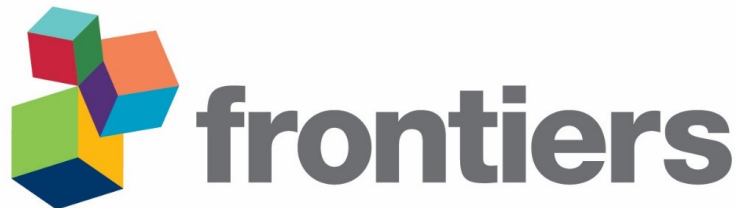

### Appendix A

**Supplementary Table 1: Word Database**

| Abstract   | Concrete |           | High Activity | Low Activity | High Potency | Low Potency | High Valence | Low Valence |
|------------|----------|-----------|---------------|--------------|--------------|-------------|--------------|-------------|
| boosheid   | hamer    | haring    | boosheid      | roze         | boosheid     | roze        | pauw         | boosheid    |
| droefheid  | zaag     | schol     | adelaar       | rijst        | zwart        | ezel        | roze         | vlo         |
| vreugde    | tang     | ansjovis  | joggen        | zwart        | adelaar      | vlo         | giraf        | zaag        |
| blijdschap | bijl     | zwaardvis | kussen        | brood        | zaag         | mier        | brood        | afgunst     |
| walging    | spijker  | goudvis   | specht        | ruit         | vreugde      | kalkoen     | adelaar      | vlieg       |
| afkeer     | beitel   | piranha   | mier          | groen        | blijdschap   | krekel      | joggen       | mug         |
| afgunst    | schroef  | inktvis   | vreugde       | bank         | leeuw        | schaap      | kussen       | jaloerie    |
| jaloerie   | werktuig | tonijn    | blijdschap    | sofa         | olifant      | vlieg       | groen        | luis        |
| wanhoop    | ploeg    | paling    | leeuw         | vierkant     | valk         | mug         | sofa         | grijs       |
| vrijheid   | wortel   | frietten  | mug           | bruin        | walging      | vlinder     | vreugde      | walging     |

## Supplementary Material

|            |             |           |           |           |          |           |            |           |
|------------|-------------|-----------|-----------|-----------|----------|-----------|------------|-----------|
| democratie | tomaat      | pasta     | jaloerie  | schaap    | hamer    | rups      | zebra      | bijl      |
| communisme | komkommer   | spaghetti | valk      | soep      | tijger   | luis      | soep       | kakkerlak |
| moral      | bloemkool   | soep      | walging   | kegel     | wolf     | tomaat    | blijdschap | boksen    |
| idealisme  | selderij    | koekjes   | tijger    | biet      | bijl     | beige     | leeuw      | wesp      |
| religie    | spinazie    | boterham  | wolf      | matras    | ploeg    | konijn    | olifant    | droefheid |
| realisme   | spruitjes   | rijst     | bijl      | rups      | boksen   | duif      | matras     | wanhoop   |
| justitie   | uien        | fruit     | ploeg     | haard     | beer     | eend      | vlinder    | spin      |
| bijgeloof  | erwt        | groenten  | tennis    | laken     | beitel   | forel     | haard      | worm      |
|            | aubergine   | brood     | boksen    | blauw     | rood     | droefheid | pasta      | gier      |
|            | biet        | snoep     | schaatsen | grijs     | spijker  | wanhoop   | tomaat     | afkeer    |
|            | knoflook    | gebak     | wesp      | tomaat    | vrijheid | worm      | kachel     |           |
|            | vlieg       | kanarie   | beer      | beige     |          | kever     | tennis     |           |
|            | mug         | duif      | spin      | kachel    |          | muis      | konijn     |           |
|            | mier        | kraai     | zwemmen   | cirkel    |          |           | schaatsen  |           |
|            | wesp        | adelaar   | vrijheid  | tafel     |          |           | zwaan      |           |
|            | spin        | specht    | voetbal   | droefheid |          |           | zwaluw     |           |
|            | kever       | parkiet   | basketbal | gebak     |          |           | hert       |           |
|            | vlinder     | zwaluw    |           | worm      |          |           | gebak      |           |
|            | kakkerlak   | eend      |           | stoel     |          |           | zwemmen    |           |
|            | worm        | gier      |           | ansjovis  |          |           | snoep      |           |
|            | hommel      | valk      |           | zetel     |          |           | zetel      |           |
|            | vlo         | pauw      |           | kruk      |          |           | vrijheid   |           |
|            | krekel      | zwaan     |           | lamp      |          |           | fruit      |           |
|            | luis        | kalkoen   |           | wortel    |          |           | basketbal  |           |
|            | bloedzuiger | fazant    |           | fruit     |          |           |            |           |
|            | rups        | haan      |           | raam      |          |           |            |           |
|            | stoel       | leeuw     |           |           |          |           |            |           |
|            | tafel       | tijger    |           |           |          |           |            |           |
|            | zetel       | olifant   |           |           |          |           |            |           |
|            | bureau      | giraf     |           |           |          |           |            |           |

|           |        |
|-----------|--------|
| kapstok   | zebra  |
| matras    | ezel   |
| kussen    | schaap |
| laken     | beer   |
| lamp      | wolf   |
| raam      | kameel |
| kruk      | hert   |
| sofa      | varken |
| bank      | lama   |
| haard     | muis   |
| kachel    | konijn |
| zalm      |        |
| kabeljauw |        |
| forel     |        |

Appendix B

**Supplementary Figure 1: Deep regions in Abstractness**

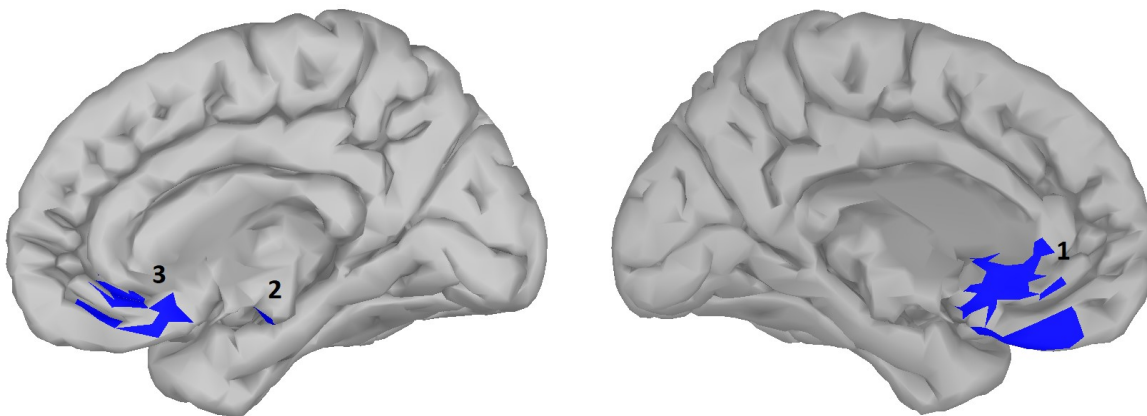

**Supplementary Table 2**

| Region | Time Window (ms) | P value (corrected) | Polarity | Stronger Condition | Cohen's d | Size (cm <sup>2</sup> ) | Estimate (10 <sup>-10</sup> A.m) | Confidence Interval (10 <sup>-10</sup> A.m) |
|--------|------------------|---------------------|----------|--------------------|-----------|-------------------------|----------------------------------|---------------------------------------------|
|--------|------------------|---------------------|----------|--------------------|-----------|-------------------------|----------------------------------|---------------------------------------------|

## Supplementary Material

|   |         |       |     |       |        |       |      |                |
|---|---------|-------|-----|-------|--------|-------|------|----------------|
| 1 | 50-350  | 0,027 | A>C | A > C | 0,0362 | 12.01 | 4.56 | [1.30 19.21]   |
| 2 | 300-650 | 0,016 | A>C | A > C | 0,0401 | 4.80  | 9.81 | [1.37 43.53]   |
| 3 | 550-700 | 0,018 | A<C | A > C | 0,035  | 8.34  | 8.84 | [-36.46 -1.76] |
